# Supplementary material for: Structures and magnetic anisotropies of two seven-coordinate Co(ii)–nitrate complexes showing slow magnetic relaxation
Source: Royal Society of Chemistry journal article supplement (doi:10.1039/d3nj02160b), 2023-01-01
Supplement: d3nj02160b1.pdf [file d3nj02160b1.pdf]

## **Structures and magnetic anisotropies of two seven-coordinate Co(II)-nitrate complexes showing slow magnetic relaxation**

Wei Lv,<sup>a</sup> Lei Chen,<sup>b</sup> Xue-Tai Chen,<sup>\*a</sup> Hong Yan,<sup>\*a</sup> Zhenxing Wang,<sup>\*c</sup> Zhong-Wen Ouyang,<sup>c</sup> Zi-Ling Xue<sup>d</sup>

<sup>a</sup>*State Key Laboratory of Coordination Chemistry, School of Chemistry and Chemical Engineering, Nanjing University, Nanjing 210023, China. Email: [xtchen@nju.edu.cn](mailto:xtchen@nju.edu.cn); [hyan1965@nju.edu.cn](mailto:hyan1965@nju.edu.cn).*

<sup>b</sup>*School of Environmental and Chemical Engineering, Jiangsu University of Science and Technology, Zhenjiang 212003, P. R. China.*

<sup>c</sup>*Wuhan National High Magnetic Field Center, Huazhong University of Science and Technology, Wuhan 430074, China. Email: [zxwang@hust.edu.cn](mailto:zxwang@hust.edu.cn).*

<sup>d</sup>*Department of Chemistry, University of Tennessee, Knoxville, Tennessee 37996, USA.*

***Electronic Supplementary Information***

**Table S1** Summary of seven-coordinated Co(II)-SIMs with non-pentagonal bipyramid geometry

| Complex                                                                                                            | Vertex                        | Geometry <sup>a</sup> | CShM value         | $D^b / \text{cm}^{-1}$ | $E^b / \text{cm}^{-1}$ | $U_{\text{eff}}$      |
|--------------------------------------------------------------------------------------------------------------------|-------------------------------|-----------------------|--------------------|------------------------|------------------------|-----------------------|
| Co(tmpdc <sup>c</sup> )(NO <sub>3</sub> ) <sub>2</sub> (this work)                                                 | N <sub>3</sub> O <sub>4</sub> | COC-7                 | 2.437              | 4.73, 3.65, —          | 0.96, 0.70, —          | —                     |
| (PPh <sub>4</sub> ) <sub>2</sub> [Co(NO <sub>3</sub> ) <sub>4</sub> ]·CH <sub>2</sub> Cl <sub>2</sub> <sup>1</sup> | O <sub>7</sub>                | IR <sup>d</sup>       | — <sup>d</sup>     | 12.85, 10.90, 11.3     | 3.60, 1.56, -0.4       | 22.5 cm <sup>-1</sup> |
| (MePh <sub>3</sub> P) <sub>2</sub> [Co(NO <sub>3</sub> ) <sub>4</sub> ] <sup>1</sup>                               | O <sub>7</sub>                | IR <sup>d</sup>       | — <sup>d</sup>     | 23.21, 12.74, 23.1     | 0.64, 2.20, -0.9       | 26.6 cm <sup>-1</sup> |
| [(L <sup>1c</sup> )Co(NO <sub>3</sub> ) <sub>2</sub> ] <sup>2</sup>                                                | N <sub>3</sub> O <sub>4</sub> | CTPR-7 <sup>e</sup>   | 2.040 <sup>e</sup> | -41.4, —, -7.23        | 4.50, —, 1.32          | —                     |
| [Co(L <sup>2c</sup> )]Cl <sub>2</sub> <sup>3</sup>                                                                 | N <sub>7</sub> (pseudo)       | COC-7                 | 1.18               | 9.20, —, 9.8           | 0.018, —, 0.294        | 9.2 cm <sup>-1</sup>  |
| [Co(L <sup>2c</sup> )]Br <sub>2</sub> <sup>3</sup>                                                                 | N <sub>7</sub> (pseudo)       | COC-7                 | 1.23               | 2.12, —, 5.9           | ~0, —, ~0              | —                     |
| [Co(L <sup>2c</sup> )]I <sub>2</sub> <sup>3</sup>                                                                  | N <sub>7</sub> (pseudo)       | COC-7                 | 1.30               | 3.61, —, 12.4          | 1.44, —, 0.074         | —                     |
| [Co(L <sup>2c</sup> )](ClO <sub>4</sub> ) <sub>2</sub> <sup>3</sup>                                                | N <sub>7</sub> (pseudo)       | COC-7                 | 1.49               | 4.21, —, 15.9          | 0.25, —, 0.032         | —                     |
| [Co(L <sup>3c</sup> ) <sub>4</sub> ](ClO <sub>4</sub> ) <sub>2</sub> <sup>4</sup>                                  | N <sub>7</sub>                | CTPR-7                | 4.033              | 25.30, —, 26.7         | -9.09, —, -8.2         | 61.30 K               |
| [Co(L <sup>4c</sup> )](BF <sub>4</sub> ) <sub>2</sub> <sup>5</sup>                                                 | N <sub>7</sub>                | CTPR-7                | 2.715              | 13.1, 13.21, 17.1      | 0.03, 0.7, -2.7        | 39.7 K                |
| [Co(L <sup>4c</sup> )](ClO <sub>4</sub> ) <sub>2</sub> ·H <sub>2</sub> O <sup>6</sup>                              | N <sub>7</sub>                | CTPR-7                | 2.538              | 15.4, 15.5, —          | 0.07, 0.93, —          | —                     |
| [Co(L <sup>4c</sup> )](PF <sub>6</sub> ) <sub>2</sub> <sup>6</sup>                                                 | N <sub>7</sub>                | COC-7                 | 2.232, 2.589       | 10.0, 10, —            | 0.07, 2.38, —          | 9.1 K                 |
| [Co(L <sup>4c</sup> )](BPh <sub>4</sub> ) <sub>2</sub> <sup>6</sup>                                                | N <sub>7</sub>                | CTPR-7                | 2.752              | 14.6, 14.5, —          | 0.06, 0.48, —          | 4.8 K                 |

a. COC-7 = capped octahedron, CTPR-7 = capped trigonal prism, IR = irregular geometry

b. The  $D$  and  $E$  values listed in this Table are obtained by fitting of PHI, HFEPD data and calculations.

c. The structures of ligands are shown in Fig. S1 below.

d. Irregular geometry due to that the CShM values of these two complexes relative to all ideal seven-coordinate geometries are too large (above 15).

e. We analysed the cif file provided with Shape 2.1 and the results demonstrate that it has a capped trigonal prismatic geometry instead of pentagonal bipyramid.

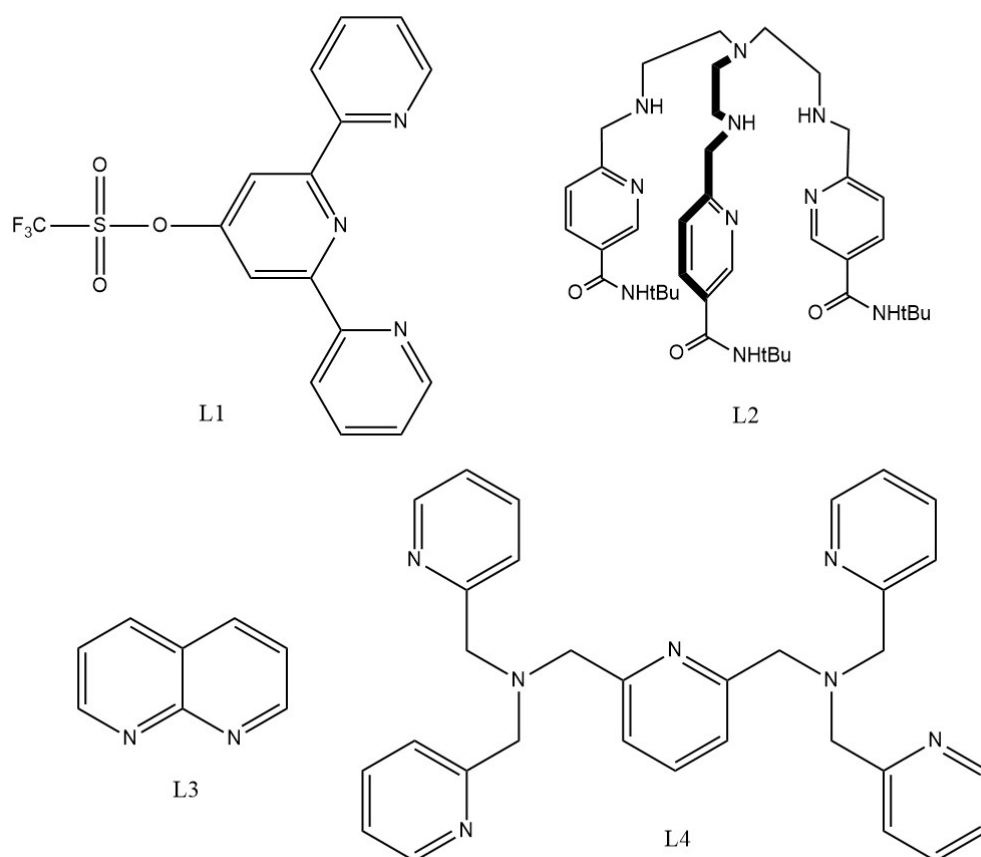

**Fig. S1** Structures of the ligands in Table S1

**Table S2** The results of the continuous shape measure (*CShM*) analyses of [(L1)Co(NO<sub>3</sub>)<sub>2</sub>]

| Seven-vertex        |                                      | [(OTfpy)Co(NO <sub>3</sub> ) <sub>2</sub> ] |
|---------------------|--------------------------------------|---------------------------------------------|
| Deviation parameter | Heptagon                             | 34.741                                      |
|                     | Hexagonal pyramid                    | 20.354                                      |
|                     | Pentagonal bipyramid                 | 7.400                                       |
|                     | Capped octahedron                    | 3.085                                       |
|                     | Capped trigonal prism                | 2.040                                       |
|                     | Johnson pentagonal bipyramid         | 10.623                                      |
|                     | Johnson elongated triangular pyramid | 17.312                                      |

**Table S3** Summary of crystal data and refinement for **1** and **2**

|                                                                                                   | <b>1</b>                                                         | <b>2</b>                                                                        |
|---------------------------------------------------------------------------------------------------|------------------------------------------------------------------|---------------------------------------------------------------------------------|
| Molecular formula                                                                                 | C <sub>11</sub> H <sub>15</sub> N <sub>5</sub> O <sub>8</sub> Co | C <sub>13</sub> H <sub>18</sub> N <sub>6</sub> O <sub>6</sub> S <sub>2</sub> Co |
| CCDC no                                                                                           | 2261409                                                          | 2261435                                                                         |
| Formula weight                                                                                    | 404.21                                                           | 477.38                                                                          |
| Temperature                                                                                       | 296(2)                                                           | 296(2)                                                                          |
| Crystal system                                                                                    | Monoclinic                                                       | Triclinic                                                                       |
| Space group                                                                                       | P 2 <sub>1</sub> /n                                              | P $\bar{1}$                                                                     |
| <i>a</i> / Å                                                                                      | 7.6026(3)                                                        | 9.7797(9)                                                                       |
| <i>b</i> / Å                                                                                      | 15.4311(6)                                                       | 10.3740(11)                                                                     |
| <i>c</i> / Å                                                                                      | 13.8687(6)                                                       | 10.8769(9)                                                                      |
| $\alpha$ (°)                                                                                      | 90                                                               | 92.616(4)                                                                       |
| $\beta$ (°)                                                                                       | 96.588(2)                                                        | 103.465(3)                                                                      |
| $\gamma$ (°)                                                                                      | 90                                                               | 112.947(3)                                                                      |
| <i>V</i> / Å <sup>3</sup>                                                                         | 1616.28(11)                                                      | 976.72(16)                                                                      |
| <i>Z</i>                                                                                          | 4                                                                | 2                                                                               |
| <i>D</i> <sub>calc</sub> , g/cm <sup>3</sup>                                                      | 1.661                                                            | 1.623                                                                           |
| $\mu$ / mm <sup>-1</sup>                                                                          | 1.115                                                            | 1.136                                                                           |
| <i>F</i> (000)                                                                                    | 828.0                                                            | 490.0                                                                           |
| $\theta$ range [°]                                                                                | 1.982/25.997                                                     | 2.350/27.239                                                                    |
| Reflns collected                                                                                  | 13059                                                            | 8633                                                                            |
| <i>R</i> <sub>int</sub>                                                                           | 0.0441                                                           | 0.0329                                                                          |
| Indep. reflns                                                                                     | 3162                                                             | 1869                                                                            |
| Data/restr./paras                                                                                 | 3162/4/230                                                       | 1869/203/149                                                                    |
| Goodness-of-fit on <i>F</i> <sup>2</sup>                                                          | 1.046                                                            | 1.046                                                                           |
| <i>R</i> <sub>1</sub> , <i>wR</i> <sub>2</sub> [ <i>I</i> > 2 $\sigma$ ( <i>I</i> )] <sup>a</sup> | 0.0301/0.0748                                                    | 0.0450/0.1160                                                                   |
| <i>R</i> <sub>1</sub> , <i>wR</i> <sub>2</sub> [all data] <sup>a</sup>                            | 0.0336/0.0772                                                    | 0.0496/0.1204                                                                   |

$$^a wR_2 = [\Sigma[w(F_o^2 - F_c^2)^2] / \Sigma[w(F_o^2)^2]]^{1/2}, R_1 = \Sigma||F_o| - |F_c|| / \Sigma|F_o|.$$

**Table S4** Selected bond lengths (Angstroms) and angles (degree) for **1** and **2**

|           | <b>1</b>  |           | <b>2</b>   |
|-----------|-----------|-----------|------------|
| Co1-N2    | 2.0648(1) | Co1-N2    | 2.0979(1)  |
| Co1-O1    | 2.1853(1) | Co1-O1    | 2.4768(1)  |
| Co1-O2    | 2.2400(1) | Co1-O2    | 2.1294(1)  |
| Co1-O4    | 2.1452(1) | Co1-O4    | 2.1318(1)  |
| Co1-O5    | 2.1716(1) | Co1-O5    | 2.2688(1)  |
| Co1-O7    | 2.1757(1) | Co1-S1    | 2.4474(5)  |
| Co1-O8    | 2.1879(1) | Co1-S2    | 2.4380(5)  |
| N2-Co1-O1 | 90.65(5)  | N2-Co1-O1 | 76.65(5)   |
| N2-Co1-O2 | 112.98(5) | N2-Co1-O2 | 131.66(6)  |
| N2-Co1-O4 | 162.43(5) | N2-Co1-O4 | 146.45(6)  |
| N2-Co1-O5 | 114.16(5) | N2-Co1-O5 | 89.02(6)   |
| N2-Co1-O7 | 75.08(5)  | N2-Co1-S1 | 83.11(4)   |
| N2-Co1-O8 | 74.06(5)  | N2-Co1-S2 | 83.40(4)   |
| O1-Co1-O2 | 57.83(5)  | O1-Co1-O2 | 55.01(5)   |
| O1-Co1-O4 | 91.26(5)  | O1-Co1-O4 | 136.15(5)  |
| O1-Co1-O5 | 149.08(5) | O1-Co1-O5 | 165.64(5)  |
| O1-Co1-O7 | 83.23(5)  | O2-Co1-O4 | 81.53(6)   |
| O1-Co1-O8 | 122.41(5) | O2-Co1-O5 | 139.31(6)  |
| O2-Co1-O4 | 82.61(5)  | O4-Co1-O5 | 57.94(6)   |
| O2-Co1-O5 | 121.33(5) | S1-Co1-O1 | 88.75(4)   |
| O2-Co1-O7 | 139.44(5) | S1-Co1-O2 | 94.39(4)   |
| O2-Co1-O8 | 77.58(5)  | S1-Co1-O4 | 101.31(4)  |
| O4-Co1-O5 | 59.49(4)  | S1-Co1-O5 | 90.54(5)   |
| O4-Co1-O7 | 87.80(5)  | S2-Co1-O1 | 86.70(4)   |
| O4-Co1-O8 | 118.98(5) | S2-Co1-O2 | 93.46(4)   |
| O5-Co1-O7 | 85.66(5)  | S2-Co1-O4 | 90.79(4)   |
| O5-Co1-O8 | 83.73(5)  | S2-Co1-O5 | 90.71(5)   |
| O7-Co1-O8 | 139.56(5) | S1-Co1-S2 | 166.427(1) |

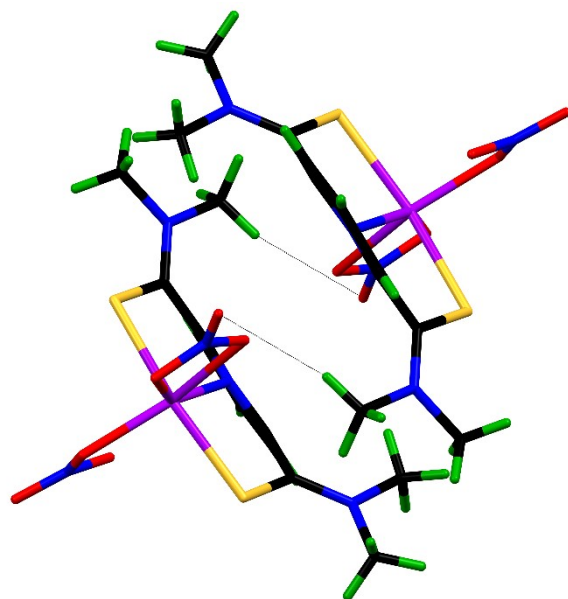

**Fig. S2** The central symmetric structure of **2** in cell unit

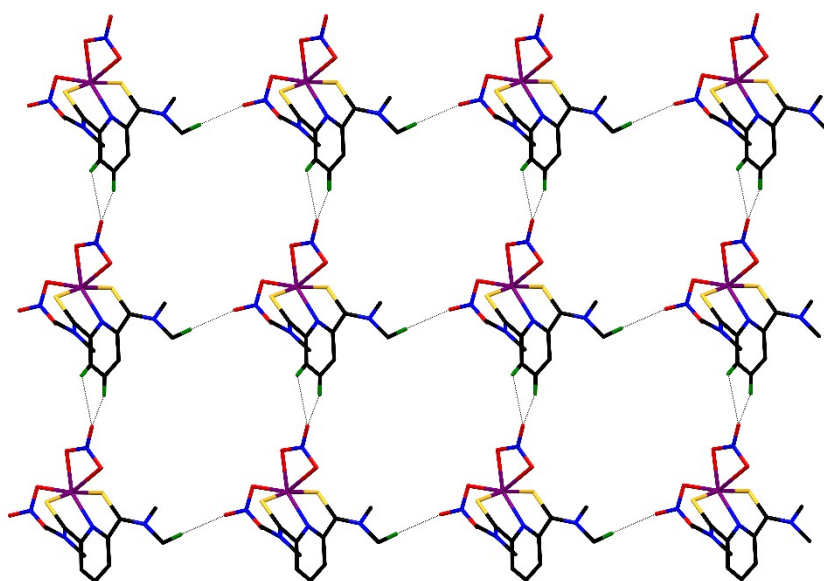

**Fig. S3** The 2-D sheet formed by intermolecular H-bonding in **2**. The hydrogens other than those involved in H-bonding are omitted for clarity.

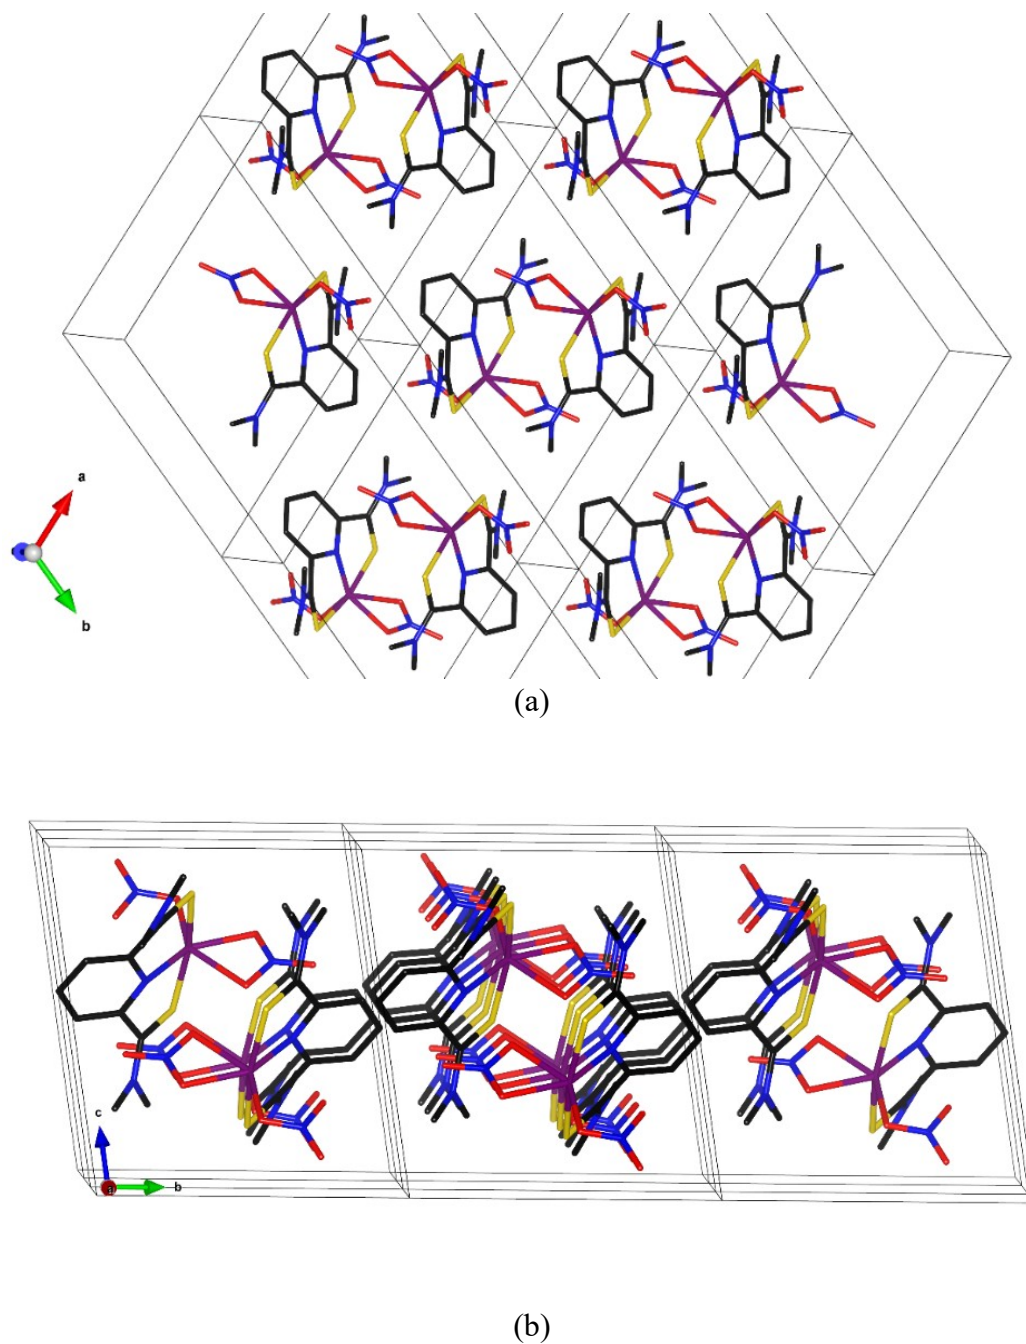

**Fig. S4** The double-decker structure of **2** formed by cell unit (drawn with VESTA Program<sup>7</sup>). The H atoms are hidden for clarity.

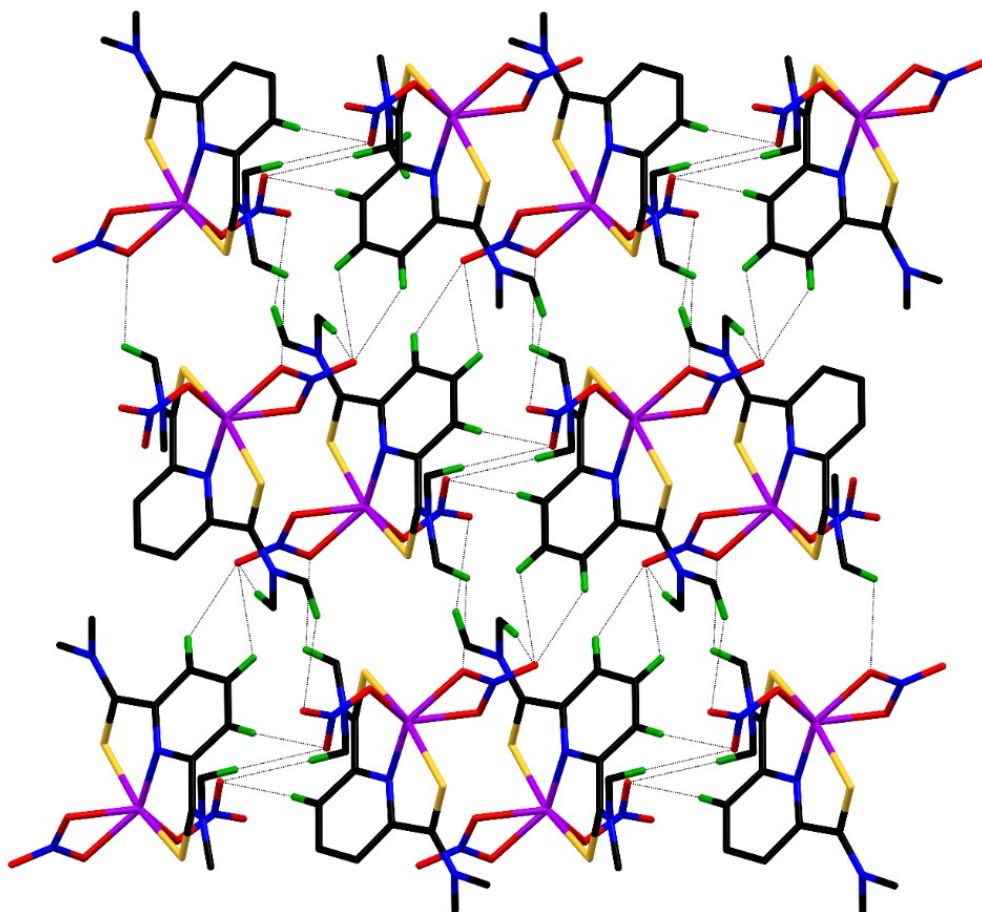

**Fig. S5** The H-bonding in 3-D structure of complex **2**

**Table S5** The results of the continuous shape measure (*CShM*) analyses of **1** and **2** by SHAPE software.

| Seven-vertex        |                                      | <b>1</b> | <b>2</b> |
|---------------------|--------------------------------------|----------|----------|
| Deviation parameter | Heptagon                             | 35.911   | 32.580   |
|                     | Hexagonal pyramid                    | 17.954   | 22.407   |
|                     | Pentagonal bipyramid                 | 8.075    | 2.217    |
|                     | Capped octahedron                    | 2.437    | 7.434    |
|                     | Capped trigonal prism                | 3.134    | 5.655    |
|                     | Johnson pentagonal bipyramid         | 11.435   | 7.415    |
|                     | Johnson elongated triangular pyramid | 16.927   | 21.426   |

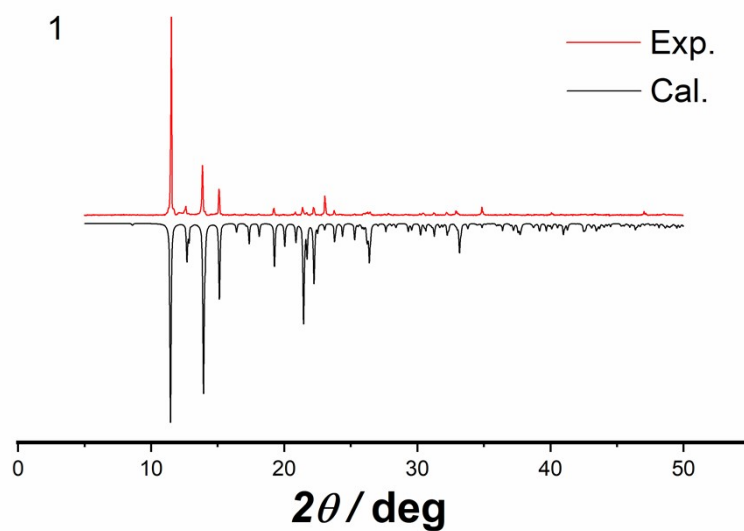

**Fig. S6** XRD patterns for **1** (The red line is PXRD experimental pattern and the black line are calculated from single-crystal structure)

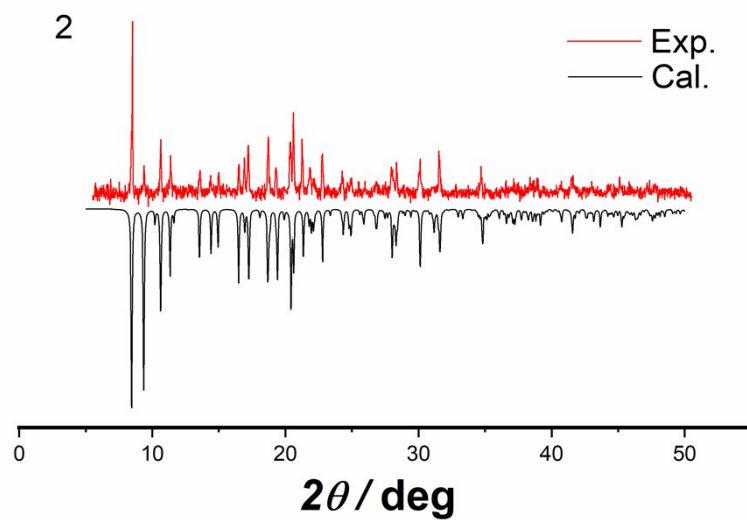

**Fig. S7** XRD patterns for **2** (The red line is PXRD experimental pattern and the black line are calculated from single-crystal structure)



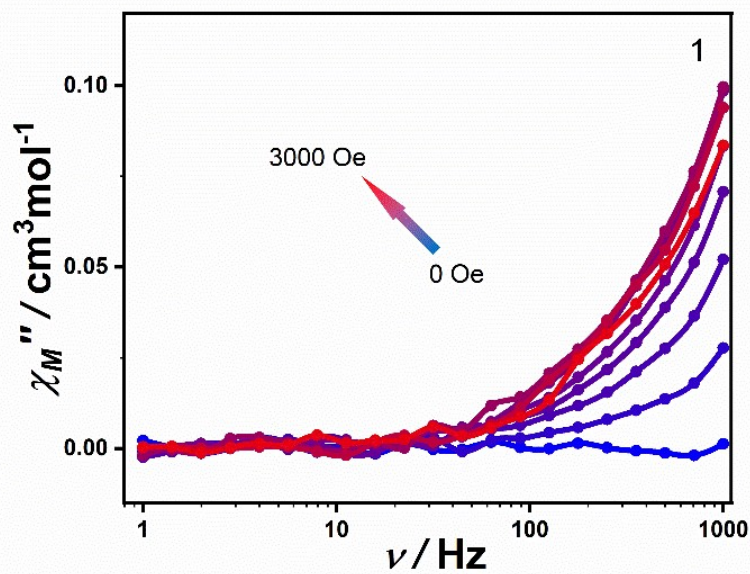

(a)

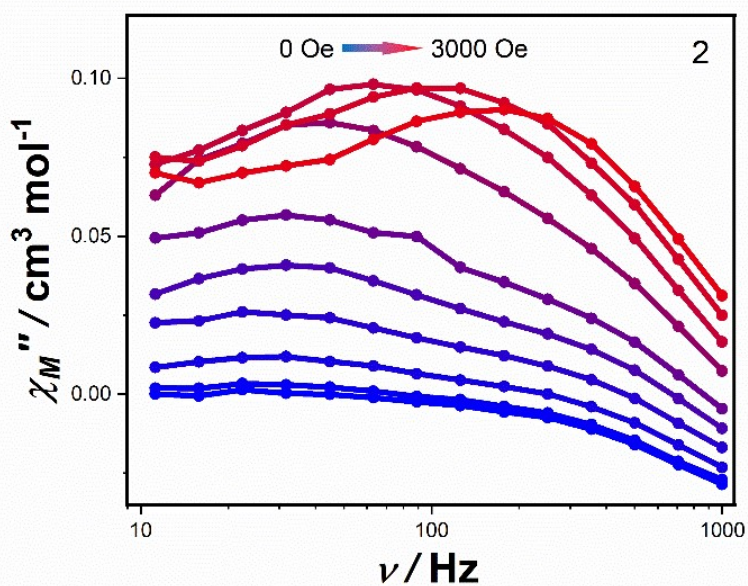

(b)

**Fig. S8** Frequency dependence of out-of-phase ac susceptibility ( $\chi_M''$ ) under the different applied static fields from 0 to 0.3 T for **1** (a) and **2** (b) at 1.8 K. The solid lines are for eye guide.

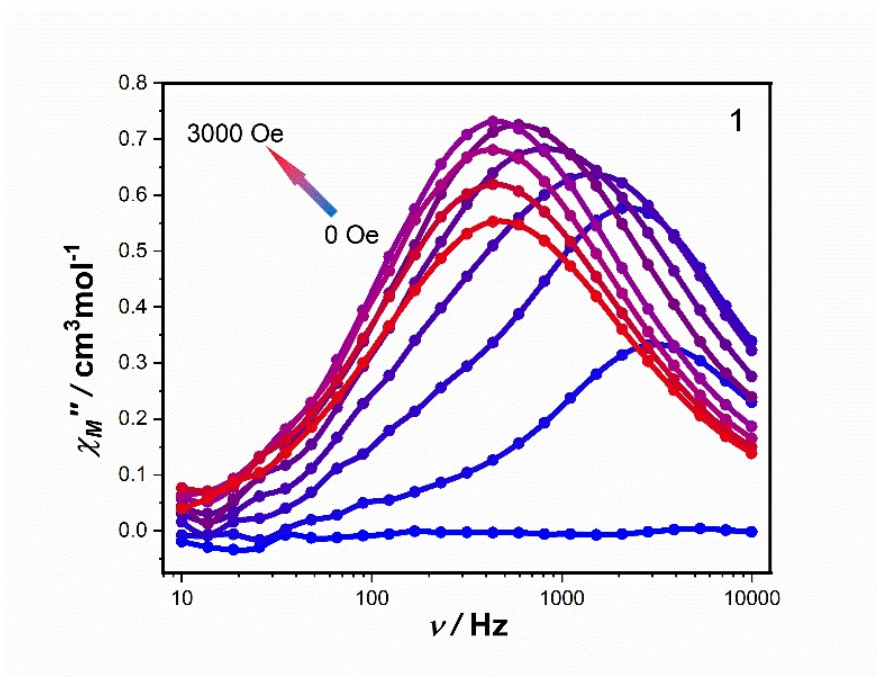

**Fig. S9** Frequency dependence of out-of-phase ac susceptibility ( $\chi_M''$ ) under the different applied static fields from 0 to 0.3 T for **1** at 1.8 K. The frequency range is 10 - 10000 Hz and the solid lines are for eye guide.

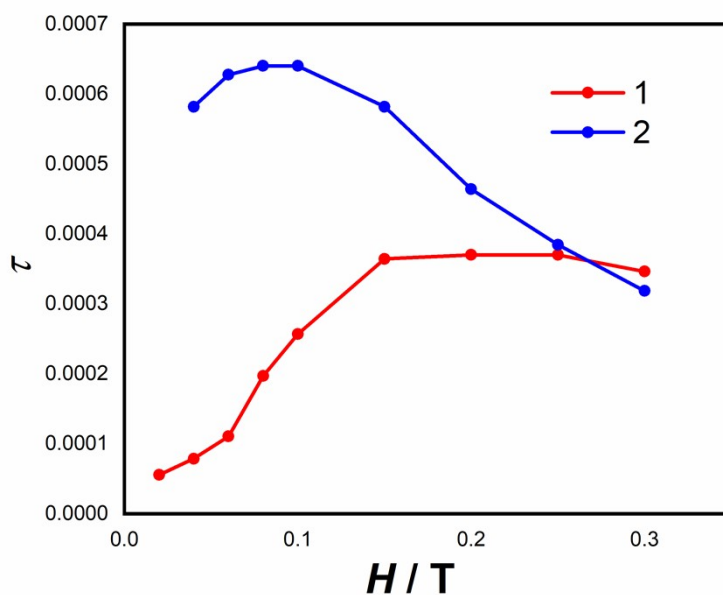

**Fig. S10** The relaxation time  $\tau$  of corresponding field for **1** and **2**.

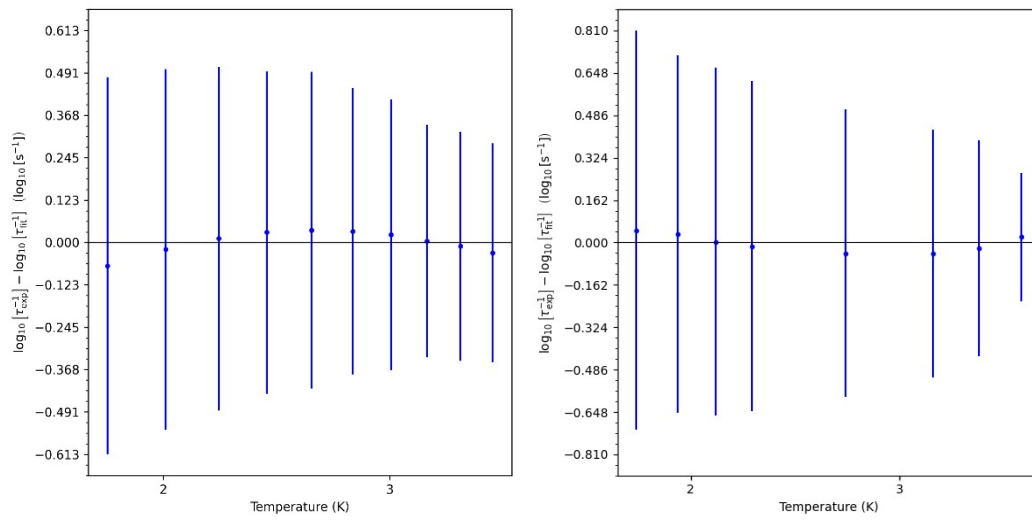

(a)

(b)

**Fig. S11** The Raman residuals versus T for **1** (a) and **2** (b) fitted by CCfit2 program.

**Table S6** Relaxation times  $\tau$  (s) and  $\alpha$  values for **1** and **2**.

| <b>1</b> |                          |                          |          |                |          |                |          |                |
|----------|--------------------------|--------------------------|----------|----------------|----------|----------------|----------|----------------|
| T        | $\tau$                   | $\tau^{err}$             | $\chi_S$ | $\chi_S^{err}$ | $\chi_T$ | $\chi_T^{err}$ | $\alpha$ | $\alpha^{err}$ |
| 1.8      | $3.1614 \times 10^{-4}$  | $5.11928 \times 10^{-6}$ | 0.54619  | 0.01175        | 2.49824  | 0.00925        | 0.17801  | 0.00815        |
| 2.0      | $1.86452 \times 10^{-4}$ | $3.35455 \times 10^{-6}$ | 0.54987  | 0.01401        | 2.37715  | 0.00895        | 0.1666   | 0.0092         |
| 2.2      | $1.18639 \times 10^{-4}$ | $2.17679 \times 10^{-6}$ | 0.55362  | 0.01481        | 2.23922  | 0.00729        | 0.15461  | 0.00927        |
| 2.4      | $8.04845 \times 10^{-5}$ | $1.51056 \times 10^{-6}$ | 0.56068  | 0.01528        | 2.1052   | 0.00561        | 0.13966  | 0.00916        |
| 2.6      | $5.75587 \times 10^{-5}$ | $9.30361 \times 10^{-7}$ | 0.55728  | 0.01319        | 1.99287  | 0.00449        | 0.13585  | 0.00778        |
| 2.8      | $4.41495 \times 10^{-5}$ | $8.90975 \times 10^{-7}$ | 0.57073  | 0.01647        | 1.8783   | 0.00448        | 0.11504  | 0.00956        |
| 3.0      | $3.35226 \times 10^{-5}$ | $7.84071 \times 10^{-7}$ | 0.57547  | 0.01794        | 1.78491  | 0.00371        | 0.105    | 0.00996        |
| 3.2      | $2.70145 \times 10^{-5}$ | $1.04017 \times 10^{-6}$ | 0.59297  | 0.02848        | 1.68953  | 0.00507        | 0.08024  | 0.01599        |
| 3.4      | $2.19474 \times 10^{-5}$ | $5.02922 \times 10^{-7}$ | 0.58788  | 0.01606        | 1.61802  | 0.00217        | 0.07854  | 0.00845        |
| 3.6      | $1.82317 \times 10^{-5}$ | $3.51846 \times 10^{-7}$ | 0.58723  | 0.01287        | 1.54881  | 0.0016         | 0.07214  | 0.00666        |
| <b>2</b> |                          |                          |          |                |          |                |          |                |
| 1.8      | 0.00479                  | $3.59708 \times 10^{-4}$ | 0.56128  | 0.0027         | 0.73712  | 0.00653        | 0.28192  | 0.02876        |
| 1.95     | 0.0043                   | $6.04246 \times 10^{-4}$ | 0.52109  | 0.00559        | 0.68839  | 0.0122         | 0.24417  | 0.06117        |
| 2.1      | 0.00404                  | $2.26324 \times 10^{-4}$ | 0.48617  | 0.00232        | 0.64929  | 0.00477        | 0.2352   | 0.02543        |
| 2.25     | 0.00373                  | $3.36182 \times 10^{-4}$ | 0.4568   | 0.00395        | 0.61478  | 0.00754        | 0.21933  | 0.04359        |
| 2.7      | 0.00289                  | $3.07957 \times 10^{-4}$ | 0.38864  | 0.00528        | 0.5298   | 0.00796        | 0.1794   | 0.05932        |
| 3.2      | 0.00215                  | $9.03009 \times 10^{-5}$ | 0.33325  | 0.00224        | 0.45765  | 0.00261        | 0.1431   | 0.02555        |
| 3.5      | 0.00175                  | $6.26525 \times 10^{-5}$ | 0.30955  | 0.00195        | 0.42206  | 0.00191        | 0.11404  | 0.02281        |
| 3.8      | 0.00138                  | $6.12936 \times 10^{-5}$ | 0.29365  | 0.00216        | 0.38957  | 0.00203        | 0.04484  | 0.03026        |

## Notes and references

1. L. Chen, H. H. Cui, S. E. Stavretis, S. C. Hunter, Y. Q. Zhang, X. T. Chen, Y. C. Sun, Z. Wang, Y. Song, A. A. Podlesnyak, Z. W. Ouyang and Z. L. Xue, *Inorg. Chem.*, 2016, **55**, 12603-12617.
2. R. F. Higgins, B. N. Livesay, T. J. Ozumerzifon, J. P. Joyce, A. K. Rappé and M. P. Shores, *Polyhedron*, 2018, **143**, 193-200.
3. C. M. Klug, T. J. Ozumerzifon, I. Bhowmick, B. N. Livesay, A. K. Rappe and M. P. Shores, *Dalton Trans.*, 2019, **48**, 9117-9126.
4. X. C. Huang, R. Xu, Y. Z. Chen, Y. Q. Zhang and D. Shao, *Chem. Asian J.*, 2020, **15**, 279-286.
5. G. Yi, H. Cui, C. Zhang, W. Zhao, L. Chen, Y. Q. Zhang, X. T. Chen, Y. Song and A. Yuan, *Dalton Trans.*, 2020, **49**, 2063-2067.
6. G. Yi, C. Zhang, W. Zhao, H. Cui, L. Chen, Z. Wang, X. T. Chen, A. Yuan, Y. Z. Liu and Z. W. Ouyang, *Dalton Trans.*, 2020, **49**, 7620-7627.
7. K. Momma and F. Izumi, *J. Appl. Crystallogr.*, 2011, **44**, 1272-7276.
